# Supplementary material
Source: PubMed Central journal article supplement (PMC2712266)
Supplement: 00262.2009_1.pdf [file 00262.2009_1.pdf]

## **SUPPLEMENTARY MATERIALS**

Neuronal correlates of instrumental learning in the dorsal striatum

Eyal Y Kimchi<sup>1</sup>, Mary M Torregrossa<sup>2</sup>,  
Jane R Taylor<sup>1,2</sup>, and Mark Laubach<sup>1,3</sup>

<sup>1</sup>Interdepartmental Neuroscience Program, Yale University,  
333 Cedar Street, New Haven, Connecticut 06510, USA.

<sup>2</sup>Division of Molecular Psychiatry, Yale University,  
Connecticut Mental Health Center, Abraham Ribicoff Research Facilities,  
34 Park Street, New Haven, Connecticut 06508, USA.

<sup>3</sup>John B. Pierce Laboratory, 290 Congress Avenue,  
New Haven, Connecticut 06519, USA.

Correspondence should be addressed to:

M.L. (mlaubach@jbpierce.org)

## Supplementary Figure 1

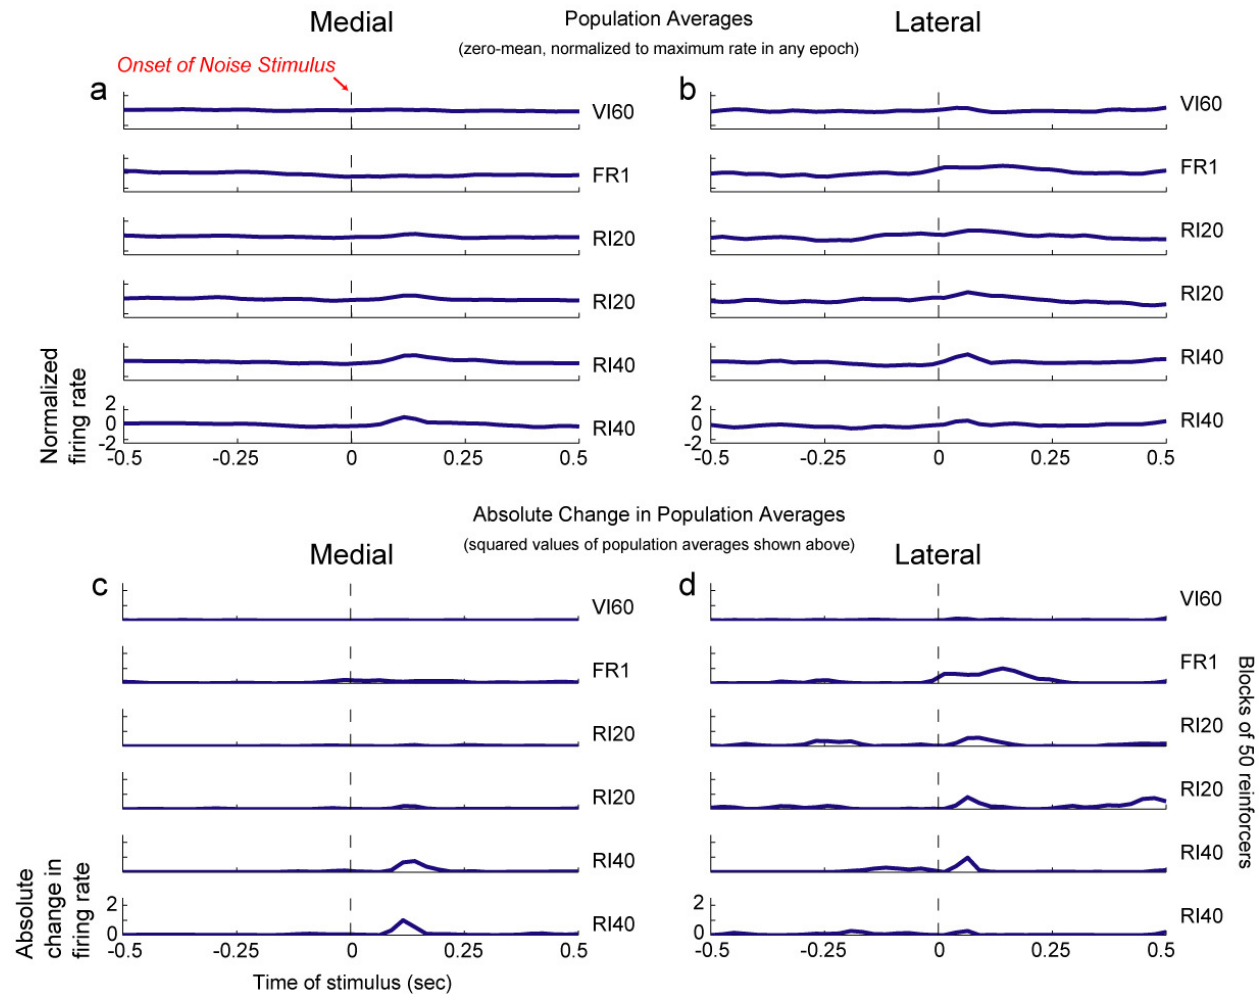

Habit formation was associated with changes in striatal firing rates during movements made in response to the conditioned stimulus. There were progressive changes in population activity during the peri-stimulus epoch, with modulation of firing rates occurring after the onset of the noise stimulus (i.e., conditioned reinforcer). In (a) and (b), population averages are shown for neurons in the medial and lateral portions of the dorsal striatum. Activity is shown for each block of 50 reinforcers during the initial training sessions (VI60, FR1, RI20, RI40). For these plots, firing rates were normalized to have a mean of zero and divided by the maximal average rate over all blocks of training. In (c) and (d), absolute changes in population activity are shown. Here, firing rates were normalized to have a mean of zero and then squared. This analysis was done to account for changes in firing rates independent of whether the neurons showed increased or decreased firing rates. Note that neurons in the medial striatum became modulated during the post-stimulus period only after the devaluation studies (Figure 2 in main body of paper) showed that the animals were responding in a habitual manner.

**Supplementary Table 1****Medial Striatum**

| Reinforcers | 50 | 100 | 150 | 200 | 250 | 300 | 350 | 400 | 450 | 500 | 550 | 600 | 650 | 700 |
|-------------|----|-----|-----|-----|-----|-----|-----|-----|-----|-----|-----|-----|-----|-----|
| Neurons     | 45 | 40  | 42  | 42  | 45  | 45  | 37  | 37  | 34  | 34  | 37  | 37  | 40  | 40  |
| Increase    | 3  | 1   | 3   | 2   | 1   | 3   | 1   | 3   | 3   | 1   | 4   | 7   | 5   | 4   |
| Decrease    | 0  | 0   | 3   | 1   | 0   | 2   | 2   | 1   | 1   | 1   | 3   | 2   | 3   | 4   |
| No change   | 42 | 39  | 36  | 39  | 44  | 40  | 34  | 33  | 30  | 32  | 30  | 28  | 32  | 32  |

**Lateral Striatum**

| Reinforcers | 50 | 100 | 150 | 200 | 250 | 300 | 350 | 400 | 450 | 500 | 550 | 600 | 650 | 700 |
|-------------|----|-----|-----|-----|-----|-----|-----|-----|-----|-----|-----|-----|-----|-----|
| Neurons     | 29 | 32  | 29  | 29  | 35  | 35  | 37  | 37  | 39  | 39  | 34  | 34  | 23  | 23  |
| Increase    | 1  | 1   | 2   | 4   | 6   | 7   | 7   | 6   | 8   | 9   | 5   | 5   | 4   | 5   |
| Decrease    | 0  | 0   | 2   | 1   | 1   | 2   | 2   | 2   | 4   | 3   | 6   | 3   | 3   | 3   |
| No change   | 28 | 31  | 25  | 24  | 28  | 26  | 28  | 29  | 27  | 27  | 23  | 26  | 16  | 15  |

A summary of the numbers of neurons recorded in each block of trials (50 reinforcers each) and in each part of the striatum is provided. The fractions of neurons with modulations of firing rate during a narrow time window around the onset of the acoustic noise stimulus (-30 ms to +20 ms compared to +20 ms to +70 ms) are noted as a function of the number of rewards earned. Neurons that showed a statistically significant change in firing rate (ranksum,  $p < 0.05$ ) are split according to whether this change was an increase or decrease.
